# Supplementary material for: Endoparasites of Small Mammals in Edo State, Nigeria: Public Health Implications
Source: PubMed Central journal article supplement — Korean J Parasitol. 2018 Feb 28;56(1):93–100. doi: 10.3347/kjp.2018.56.1.93 (PMC5858659; doi:10.3347/kjp.2018.56.1.93), 2018-02-28
Supplement: kjp-56-1-93-suppl2.pdf [file kjp-56-1-93-suppl2.pdf]

**Supplementary Table 2.** Prevalence of parasites of rodents trapped in Auchi

| Parasite/small mammal |                                     | No. of mammals (%)            |                              |                           |                               |                        |
|-----------------------|-------------------------------------|-------------------------------|------------------------------|---------------------------|-------------------------------|------------------------|
|                       |                                     | <i>M. natalensis</i><br>(n=2) | <i>M. musculus</i><br>(n=44) | <i>R. rattus</i><br>(n=5) | <i>R. norvegicus</i><br>(n=2) | Total<br>(n=53)        |
| Intestinal parasites  | <i>Capillaria</i> sp.               | 0                             | 1 (2.3)                      | 0                         | 0                             | 1 (1.9)                |
|                       | <i>Eimeria</i> sp.                  | 2 (100.0)                     | 6 (13.6)                     | 1 (20.0)                  | 0                             | 9 (17.0)               |
|                       | <i>Isospora</i> sp.                 | 0                             | 6 (13.6)                     | 0                         | 0                             | 6 (11.3)               |
|                       | <i>Nippostrongylus brasiliensis</i> | 0                             | 0                            | 1 (25.0)                  | 0                             | 1 (1.9)                |
|                       | <i>Strogylodes</i> sp.              | 0                             | 9 (20.5)                     | 0                         | 0                             | 9 (17.0)               |
|                       | <i>Trichuris</i> sp.                | 0                             | 2 (4.5)                      | 0                         | 0                             | 2 (3.8)                |
| Blood parasites       | <i>Babesia</i> sp.                  | 0                             | 1 (2.6) <sup>a</sup>         | 0                         | 0                             | 1 (2.2) <sup>c</sup>   |
|                       | <i>Plasmodium</i> sp.               | 1 (50.0)                      | 25 (65.8) <sup>a</sup>       | 2 (66.7) <sup>b</sup>     | 2 (100.0)                     | 30 (66.7) <sup>c</sup> |
| Brain parasites       | -                                   | -                             | -                            | -                         | -                             | -                      |

<sup>a</sup>Percentage positive calculated with *M. musculus* sample size (n=38).

<sup>b</sup>Percentage positive calculated with *R. rattus* sample size (n=3).

<sup>c</sup>Percentage positive calculated with a total rodent sample size (n=45).
