# Supplementary material for: Endoparasites of Small Mammals in Edo State, Nigeria: Public Health Implications
Source: PubMed Central journal article supplement — Korean J Parasitol. 2018 Feb 28;56(1):93–100. doi: 10.3347/kjp.2018.56.1.93 (PMC5858659; doi:10.3347/kjp.2018.56.1.93), 2018-02-28
Supplement: kjp-56-1-93-suppl3.pdf [file kjp-56-1-93-suppl3.pdf]

**Supplementary Table 3.** Prevalence of parasites of small mammals trapped in Benin

| Parasite/small mammal |                                     | No. of mammals (%)           |                               |                               |                            |                               |                           | Total<br>(n=150)       |
|-----------------------|-------------------------------------|------------------------------|-------------------------------|-------------------------------|----------------------------|-------------------------------|---------------------------|------------------------|
|                       |                                     | <i>Apodemus</i> sp.<br>(n=2) | <i>M. natalensis</i><br>(n=1) | <i>M. musculus</i><br>(n=107) | <i>R. rattus</i><br>(n=31) | <i>R. norvegicus</i><br>(n=5) | <i>Sorex</i> sp.<br>(n=4) |                        |
| Intestinal parasites  | <i>Aspicularis</i> sp.              | 0                            | 0                             | 1 (0.93)                      | 2 (6.5)                    | 0                             | 0                         | 3 (2)                  |
|                       | <i>Eimeria</i> sp.                  | 0                            | 0                             | 22 (20.6)                     | 10 (32.3)                  | 2 (40.0)                      | 0                         | 34 (22.7)              |
|                       | <i>Gongylonema</i> sp.              | 0                            | 0                             | 0                             | 0                          | 1 (20.0)                      | 0                         | 1 (0.66)               |
|                       | <i>Heterakis spumosa</i>            | 0                            | 0                             | 3 (2.8)                       | 1 (3.2)                    | 0                             | 0                         | 4 (2.7)                |
|                       | <i>Hymenolepis nana</i>             | 0                            | 0                             | 0                             | 1 (3.2)                    | 0                             | 0                         | 1 (0.66)               |
|                       | <i>Isoospora</i> sp.                | 0                            | 0                             | 17 (15.9)                     | 2 (6.5)                    | 0                             | 0                         | 19 (12.7)              |
|                       | <i>Mastophorus muris</i>            | 0                            | 0                             | 3 (2.8)                       | 0                          | 0                             | 0                         | 3 (2.0)                |
|                       | <i>Nippostrongylus brasiliensis</i> | 0                            | 0                             | 4 (3.7)                       | 2 (6.5)                    | 1 (20.0)                      | 0                         | 7 (4.7)                |
|                       | <i>Strongyloides</i> sp.            | 2 (100.0)                    | 0                             | 12 (11.2)                     | 10 (32.3)                  | 2 (40.0)                      | 0                         | 26 (17.3)              |
|                       | <i>Trichosomoides</i> sp.           | 0                            | 0                             | 1 (0.93)                      | 0                          | 0                             | 0                         | 1 (0.66)               |
|                       | <i>Trichuris</i> sp.                | 0                            | 0                             | 3 (2.8)                       | 2 (6.5)                    | 1 (20.0)                      | 0                         | 6 (4.0)                |
| Blood parasites       | <i>Babesia</i> sp.                  | 0                            | 0                             | 2 (2.0) <sup>a</sup>          | 0                          | 0                             | 0                         | 2 (1.5) <sup>c</sup>   |
|                       | <i>Plasmodium</i> sp.               | 1 (50.0)                     | 1 (100.0)                     | 63 (63.6) <sup>a</sup>        | 15 (51.7) <sup>b</sup>     | 3 (60.0)                      | 3 (75.0)                  | 87 (64.4) <sup>c</sup> |
|                       | <i>Trypanosoma lewisi</i>           | 0                            | 0                             | 0                             | 1 (3.4) <sup>b</sup>       | 0                             | 0                         | 1 (0.74) <sup>c</sup>  |
| Brain parasites       | -                                   | -                            | -                             | -                             | -                          | -                             | -                         | -                      |

<sup>a</sup>Percentage positive calculated with *M. musculus* sample size (n=99).

<sup>b</sup>Percentage positive calculated with *R. rattus* sample size (n=29).

<sup>c</sup>Percentage positive calculated with a total rodent sample size (n=135).
