# Supplementary material for: Endoparasites of Small Mammals in Edo State, Nigeria: Public Health Implications
Source: PubMed Central journal article supplement — Korean J Parasitol. 2018 Feb 28;56(1):93–100. doi: 10.3347/kjp.2018.56.1.93 (PMC5858659; doi:10.3347/kjp.2018.56.1.93), 2018-02-28
Supplement: kjp-56-1-93-suppl4.pdf [file kjp-56-1-93-suppl4.pdf]

**Supplementary Table 4.** Prevalence of parasites of small mammals trapped in Ekpoma

| Parasite/small mammal | No. of mammals (%)            |                               |                               |                            |                                |                           |                  |                        |
|-----------------------|-------------------------------|-------------------------------|-------------------------------|----------------------------|--------------------------------|---------------------------|------------------|------------------------|
|                       | <i>Crocidura</i> sp.<br>(n=1) | <i>M. natalensis</i><br>(n=2) | <i>M. musculus</i><br>(n=139) | <i>R. rattus</i><br>(n=50) | <i>R. norvegicus</i><br>(n=13) | <i>Sorex</i> sp.<br>(n=2) | Total<br>(n=207) |                        |
| Intestinal parasites  | <i>Aspicularis</i> sp.        | 0                             | 0                             | 1 (0.71)                   | 1 (2.0)                        | 0                         | 0                | 2 (0.96)               |
|                       | <i>Eimeria</i> sp.            | 0                             | 0                             | 9 (6.5)                    | 7 (14.0)                       | 1 (7.7)                   | 0                | 17 (8.2)               |
|                       | <i>Gongylonema</i> sp.        | 0                             | 0                             | 0                          | 0                              | 1 (7.7)                   | 0                | 1 (0.48)               |
|                       | <i>H. spumosa</i>             | 0                             | 0                             | 8 (5.8)                    | 3 (6.0)                        | 1 (7.7)                   | 0                | 12 (5.8)               |
|                       | <i>H. diminuta</i>            | 0                             | 0                             | 1 (0.71)                   | 0                              | 3 (23.1)                  | 1 (50.0)         | 5 (2.4)                |
|                       | <i>H. nana</i>                | 0                             | 0                             | 2 (1.4)                    | 2 (4.0)                        | 0                         | 1 (50.0)         | 5 (2.4)                |
|                       | <i>Isoospora</i> sp.          | 0                             | 0                             | 10 (7.2)                   | 4 (8.0)                        | 1 (7.7)                   | 0                | 15 (7.2)               |
|                       | <i>M. muris</i>               | 0                             | 1 (50.0)                      | 5 (3.6)                    | 4 (8.0)                        | 1 (7.7)                   | 0                | 11 (5.3)               |
|                       | <i>M. moniliformis</i>        | 0                             | 0                             | 0                          | 1 (2.0)                        | 0                         | 0                | 1 (0.48)               |
|                       | <i>N. brasiliensis</i>        | 0                             | 0                             | 5 (3.6)                    | 4 (8.0)                        | 5 (38.5)                  | 0                | 14 (6.8)               |
|                       | <i>Strongyloides</i> sp.      | 1 (100.0)                     | 0                             | 8 (5.8)                    | 5 (10.0)                       | 5 (38.5)                  | 0                | 19 (9.2)               |
|                       | <i>Trichosomoides</i> sp.     | 0                             | 0                             | 0                          | 0                              | 1 (7.7)                   | 1 (50.0)         | 2 (0.96)               |
|                       | <i>Trichuris</i> sp.          | 0                             | 1 (50.0)                      | 9 (6.5)                    | 0                              | 0                         | 0                | 10 (4.8)               |
| Blood parasites       | <i>Babesia</i> sp.            | 0                             | 2 (100.0)                     | 1 (0.75) <sup>a</sup>      | 1 (2.0) <sup>b</sup>           | 0                         | 0                | 4 (2.1) <sup>c</sup>   |
|                       | <i>Plasmodium</i> sp.         | 0                             | 2 (100.0)                     | 63 (47.4) <sup>a</sup>     | 21 (42.9) <sup>b</sup>         | 7 (53.8)                  | 1 (50.0)         | 94 (49.0) <sup>c</sup> |
|                       | <i>Trypanosoma lewisi</i>     | 0                             | 0                             | 7 (5.3) <sup>a</sup>       | 2 (4.1) <sup>b</sup>           | 0                         | 0                | 9 (4.7) <sup>c</sup>   |
| Brain parasites       | <i>Angiostrongylus</i> sp.    | 0                             | 0                             | 3 (2.2)                    | 0                              | 0                         | 0                | 3 (1.4)                |
|                       | <i>T. gondii</i>              | 0                             | 0                             | 1 (0.71)                   | 1 (2.0)                        | 0                         | 0                | 2 (0.96)               |

<sup>a</sup>Percentage positive calculated with *M. musculus* sample size (n=133).

<sup>b</sup>Percentage positive calculated with *R. rattus* sample size (n=49).

<sup>c</sup>Percentage positive calculated with a total rodent sample size (n=192).
