# Supplementary material for: Endoparasites of Small Mammals in Edo State, Nigeria: Public Health Implications
Source: PubMed Central journal article supplement — Korean J Parasitol. 2018 Feb 28;56(1):93–100. doi: 10.3347/kjp.2018.56.1.93 (PMC5858659; doi:10.3347/kjp.2018.56.1.93), 2018-02-28
Supplement: kjp-56-1-93-suppl5.pdf [file kjp-56-1-93-suppl5.pdf]

**Supplementary Table 5.** Prevalence of parasites of small mammals trapped in Uromi

| Parasite/small mammal | No. of mammals (%)           |                               |                              |                            |                               |                           |                 |                        |
|-----------------------|------------------------------|-------------------------------|------------------------------|----------------------------|-------------------------------|---------------------------|-----------------|------------------------|
|                       | <i>Apodemus</i> sp.<br>(n=1) | <i>M. natalensis</i><br>(n=2) | <i>M. musculus</i><br>(n=71) | <i>R. rattus</i><br>(n=15) | <i>R. norvegicus</i><br>(n=2) | <i>Sorex</i> sp.<br>(n=1) | Total<br>(n=92) |                        |
| Intestinal parasites  | <i>Aspicularis</i> sp.       | 0                             | 0                            | 1 (1.4)                    | 1 (6.7)                       | 0                         | 0               | 2 (2.2)                |
|                       | <i>Eimeria</i> sp.           | 1 (100.0)                     | 0                            | 12 (16.9)                  | 7 (46.7)                      | 1 (50.0)                  | 0               | 20 (21.7)              |
|                       | <i>H. spumosa</i>            | 0                             | 0                            | 4 (5.6)                    | 0                             | 0                         | 0               | 4 (4.3)                |
|                       | <i>H. nana</i>               | 0                             | 0                            | 0                          | 0                             | 0                         | 1 (100.0)       | 1 (1.1)                |
|                       | <i>Isospora</i> sp.          | 0                             | 0                            | 10 (14.1)                  | 0                             | 2 (100.0)                 | 0               | 3 (3.3)                |
|                       | <i>M. muris</i>              | 0                             | 0                            | 2 (2.8)                    | 2 (13.3)                      | 0                         | 0               | 4 (4.3)                |
|                       | <i>N. brasiliensis</i>       | 0                             | 0                            | 1 (1.4)                    | 2 (13.3)                      | 0                         | 0               | 3 (3.3)                |
|                       | <i>Strogylodes</i> sp.       | 0                             | 0                            | 5 (7.0)                    | 1 (6.7)                       | 1 (50.0)                  | 0               | 7 (7.7)                |
|                       | <i>Trichuris</i> sp.         | 0                             | 0                            | 0                          | 1 (6.7)                       | 0                         | 0               | 1 (1.1)                |
| Blood parasites       | <i>Babesia</i> sp.           | 0                             | 0                            | 2 (3.3) <sup>a</sup>       | 0                             | 0                         | 0               | 2 (2.7) <sup>d</sup>   |
|                       | <i>Plasmodium</i> sp.        | 0                             | 1 (50.0)                     | 37 (62.7) <sup>a</sup>     | 7 (50.0) <sup>b</sup>         | 1 (100.0) <sup>c</sup>    | 0               | 46 (61.3) <sup>d</sup> |
| Brain parasites       | -                            | -                             | -                            | -                          | -                             | -                         | -               | -                      |

<sup>a</sup>Percentage positive calculated with *M. musculus* sample size (n=59).

<sup>b</sup>Percentage positive calculated with *R. rattus* sample size (n=14).

<sup>c</sup>Percentage positive calculated with only 1 *R. norvegicus*.

<sup>d</sup>Percentage positive calculated with a total of 75 rodents.
